# Supplementary material
Source: PubMed Central journal article supplement (PMC1852226)
Supplement: blood_blood-2006-09-047704_1.pdf [file blood_blood-2006-09-047704_1.pdf]

**hES cells /feeders**

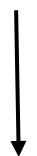

SR  
+bFGF

**hES cells /matrigel**

**1day**

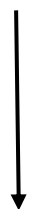

SR  
+bFGF

**T0**

Suspension

**T1**

**T4**

**T8**

**Aggregation**

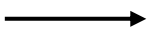

**Induction 1**

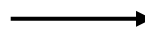

**Induction 2**

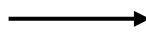

**Differentiation**

Serum free  
+BMP-4 10ng  
-bFGF

Serum free  
+BMP-4 10ng  
+bFGF 5ng

Serum free  
+BMP-4 10ng  
+bFGF 5ng  
+VEGF 10ng

**10 cell aggregates**

**Embryoid Bodies**

**Embryoid Bodies**
