# Supplementary material
Source: PubMed Central journal article supplement (PMC1852226)

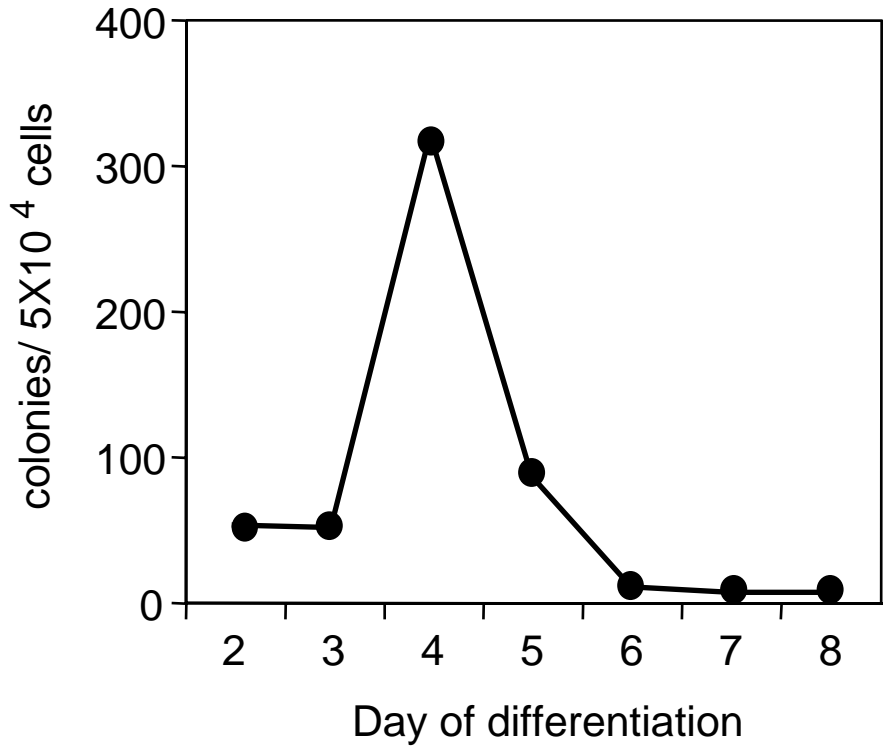

Supplement: blood_blood-2006-09-047704_2.pdf [file blood_blood-2006-09-047704_2.pdf]
